# Supplementary material
Source: PubMed Central journal article supplement (PMC3957186)
Supplement: NIHMS543103-supplement-01.pdf [file NIHMS543103-supplement-01.pdf]

## Supplementary appendix

This appendix formed part of the original submission and has been peer reviewed. We post it as supplied by the authors.

Supplement to: Rigby MR, DiMeglio LA, Rendell MS, et al. Targeting of memory T cells with alefacept in new-onset type 1 diabetes (T1DAL study): 12 month results of a randomised, double-blind, placebo-controlled phase 2 trial. *Lancet Diabetes Endocrinol* 2013; published online Sept 23. [http://dx.doi.org/10.1016/10.1016/S2213-8587\(13\)70111-6](http://dx.doi.org/10.1016/10.1016/S2213-8587(13)70111-6).

Supplementary Figure 2I: Calculated absolute counts of CD8 Tems

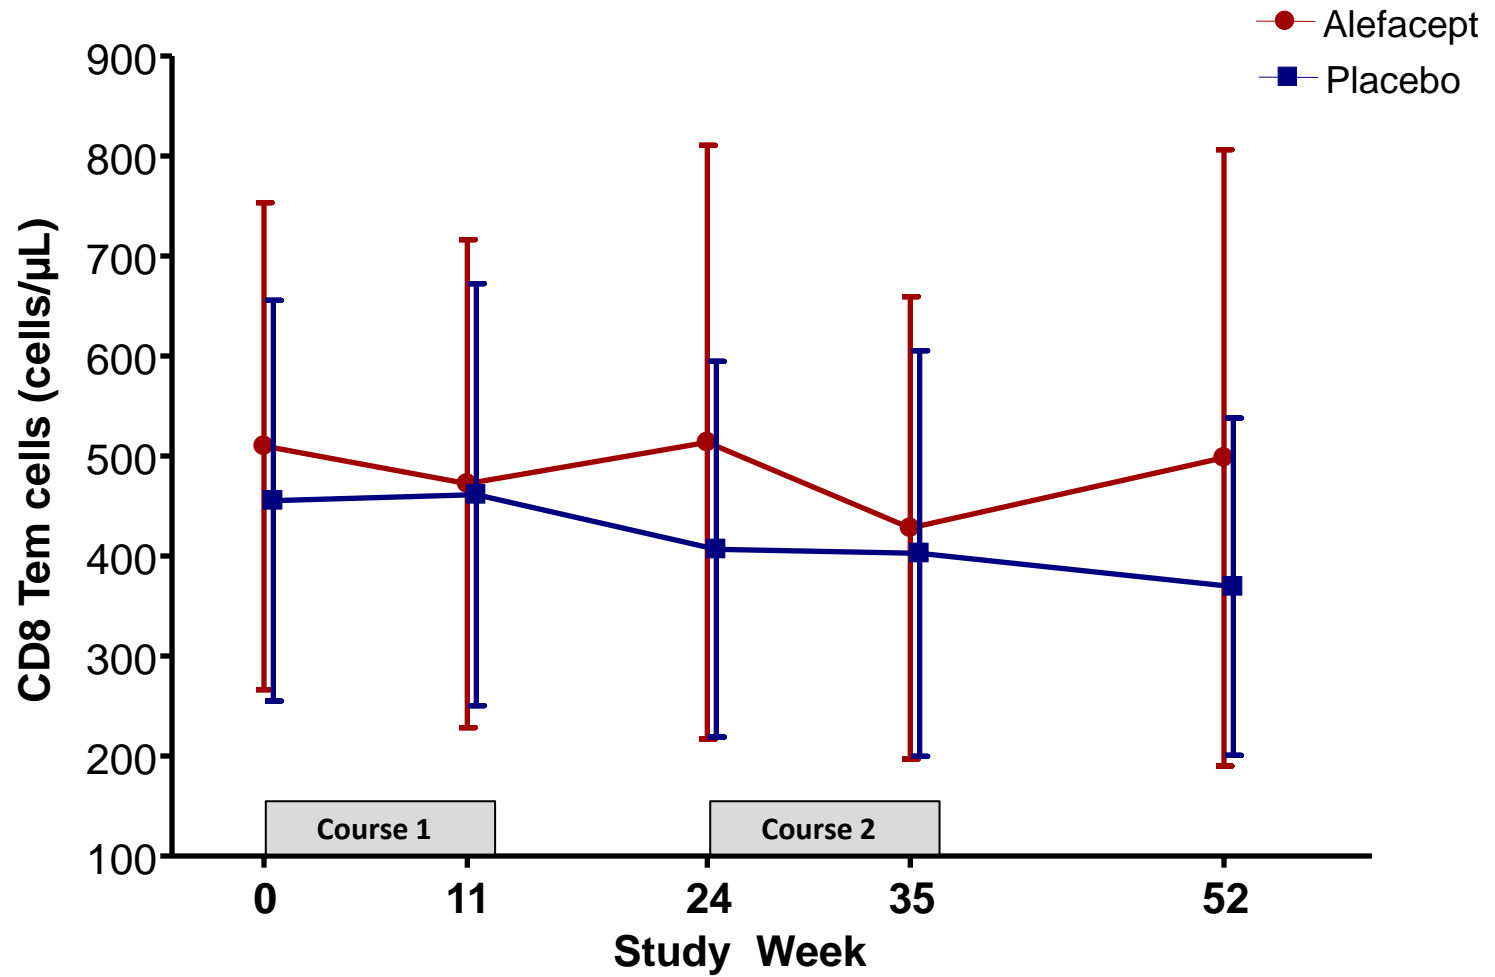

**Supplementary Table 1. Flow cytometry panels****Panel design for characterization of T cells**

| <b>Fluorophor</b>  | <b>Marker</b> | <b>Manufacturer</b> | <b>Cat. No.</b> | <b>Clone</b> |
|--------------------|---------------|---------------------|-----------------|--------------|
| <b>PerCP-eF710</b> | CD2           | eBio                | 46-0029-42      | RPA-2.10     |
| <b>BV421</b>       | CD127         | BL                  | 351310          | A019D5       |
| <b>V500</b>        | CD4           | BD                  | 560769          | RPA-T4       |
| <b>BV650</b>       | CD8           | BL                  | 301041          | RPA-T8       |
| <b>AF700</b>       | CD3           | BD                  | 557943          | UCHT1        |
| <b>PE</b>          | CCR7          | BL                  | 353204          | G043H7       |
| <b>PE-Cy7</b>      | CD45RA        | BL                  | 304126          | HI100        |
| <b>PE-CF594</b>    | CD25          | BD                  | 562403          | M-A251       |
| <b>AF488</b>       | Helios        | BL                  | 137223          | 22F6         |
| <b>AF647</b>       | FOXP3         | BL                  | 320114          | 206D         |

**Panel design for characterization of B cells and other immune cell populations**

| <b>Fluorophor</b>  | <b>Marker</b> | <b>Manufacturer</b> | <b>Cat. No.</b> | <b>Clone</b> |
|--------------------|---------------|---------------------|-----------------|--------------|
| <b>FITC</b>        | CD2           | BD                  | 347593          | S5.2         |
| <b>PerCP-Cy5.5</b> | CD123         | BD                  | 560094          | 7G3          |
| <b>V450</b>        | CD11c         | BD                  | 560369          | B-ly6        |
| <b>V500</b>        | CD14          | BD                  | 561391          | RPA-T4       |
| <b>BV605</b>       | CD27          | BD                  | 562655          | L128         |
| <b>BV650</b>       | CD8           | BL                  | 301041          | RPA-T8       |
| <b>AF647</b>       | CD16          | BL                  | 302020          | 3G8          |
| <b>AF700</b>       | HLA-DR        | BL                  | 307626          | L243         |
| <b>PE</b>          | CD56          | BL                  | 318305          | HCD56        |
| <b>PE-Cy7</b>      | CD19          | BL                  | 302215          | HIB19        |
| <b>PE-CF594</b>    | CD3           | BD                  | 562280          | UCHT1        |

**Supplementary Table 2: Gating strategy for T and B cell populations**

|                       |                                                           |                    |                 |
|-----------------------|-----------------------------------------------------------|--------------------|-----------------|
| CD4,<br>Non-<br>Tregs | Live gate<br>→singlets→lymph→CD3+→CD4+<br>→CD127+FOXP3neg | Naïve              | CD45RA+CCR7+    |
|                       |                                                           | Central<br>Memory  | CD45RAnegCCR7+  |
|                       |                                                           | Effector<br>Memory | CD45RAnegCCR7lo |
|                       |                                                           |                    |                 |
| Tregs                 | Live gate →singlets→lymph→CD3+→CD4+ →CD127neg/loFOXP3+    |                    |                 |
|                       |                                                           |                    |                 |
| CD8                   | Live gate<br>→singlets→lymph→CD3+→CD8+                    | Naïve              | CD45RA+CCR7+    |
|                       |                                                           | Central<br>Memory  | CD45RAnegCCR7+  |
|                       |                                                           | Effector<br>Memory | CD45RAnegCCR7lo |
|                       |                                                           |                    |                 |
| B Cells               | Live gate →singlets→lymph→CD3negCD16neg→CD19+             |                    |                 |

## **Supplementary Statistical Methods**

**Computation of 2-hour C-peptide AUC:** The 2-hour C-peptide AUC was calculated using the trapezoidal rule over a 2-hour period (0-120 minutes). The “time 0” C-peptide value was taken as the average of C-peptide values measured at time points -10 and 0 minutes. The AUC calculation was based on the available time points from the MMTT. Results reported as less than the lower limit of detection were imputed as half the lower limit of detection for that time point.

**Imputation for missing Week 52 MMTT:** The MMTT performed at the Week 52 visit was used, regardless of time out of window. For a participant who missed the entire Week 52 MMTT assessment, the missing AUC values were imputed using the following approach for the primary analysis of the primary endpoint: If the subject’s last observed AUC value was 0, the missing Week 52 AUC was imputed to zero. If the subject’s last observed AUC value was at time  $t$  and was  $>0$ , then the missing AUC at Week 52 was imputed using data from subjects in the same arm who had available AUC values at both time  $t$  and Week 52. Specifically, a linear regression line and 90% confidence bands were fit where Week 52 AUC values were regressed on AUC values at time  $t$  (e.g. Week 24). In each arm, a missing Week 52 AUC value was imputed as the value predicted from the linear regression line.

Sensitivity analyses were also performed on the ITT population using the following approaches:

- Using observed data only (i.e. without imputing any missing Week 52 AUCs.)
- Optimistic: In the active therapy arm, a missing Week 52 AUC value was imputed as the value predicted from the estimated upper limit of a 90% confidence band about the linear regression line. In the control group, a missing Week 52 AUC value was imputed as the

value predicted from the estimated lower limit of a 90% confidence band about the regression line.

- **Conservative:** In the active therapy arm, a missing Week 52 AUC value was imputed as the value predicted from the estimated lower limit of a 90% confidence band about the linear regression line. In the control group, a missing Week 52 AUC value was imputed as the value predicted from the estimated upper limit of a 90% confidence band about the regression line.

**Computation of 4-hour C-peptide AUC:** The 4-hour C-peptide AUC was calculated using the same method as the 2-hour C-peptide AUC, only over a 4-hour time period (0-240 minutes). Missing 4-hour C-peptide AUC values were imputed using the same approach as the primary analysis of the primary endpoint.
